# Supplementary material
Source: publisher figshare collection journal article supplement (https://tandf.figshare.com/ndownloader/files/12980651)
Supplement: Supplementary file 1 [file 12980651]

# SUPPLEMENTAL DATA

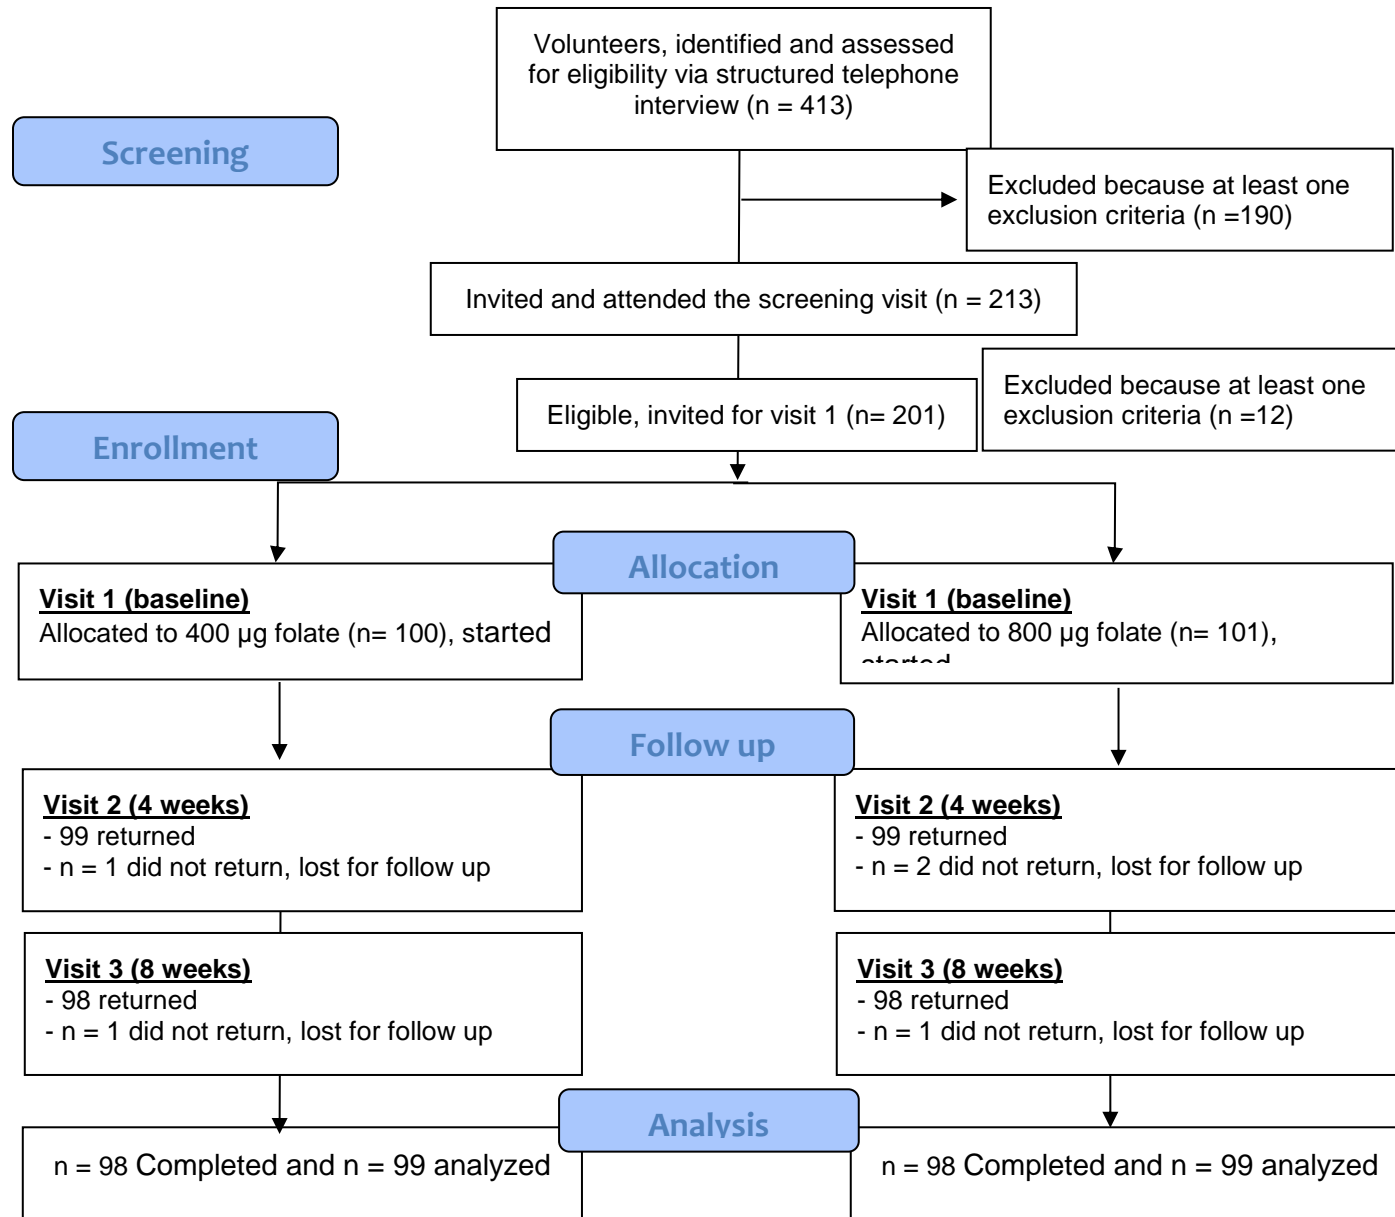

**Table S1.** The correlations between blood folate markers and dietary folate intake in 198 young women not receiving supplements.

|              | 2*3-d folate intake | Serum folate   | RBC-folate     |
|--------------|---------------------|----------------|----------------|
| tHcy         | -0.004 (0.957)      | -0.193 (0.006) | -0.163 (0.021) |
| RBC-folate   | 0.126 (0.077)       | 0.589 (<0.001) |                |
| Serum folate | 0.145 (0.041)       |                |                |

The numbers are correlation coefficients and (p values) calculated using Spearman-Rho test. The 2\*3-d folate intake represent the mean of 2 dietary intake protocols repeated within 8 days.
